# Supplementary material
Source: Research Square preprint supplement (doi:10.21203/rs.3.rs-9861096/v1)
Supplement: Supplementary file 1 [file 96dbc580fad26ef6d97e3d09.docx]

Table 1. Invasive plant species in Polish National Parks

| Scientific Name & family | Location (National Park) | Common name | Life form | Pharmacological activities | Therapeutic compounds |
| --- | --- | --- | --- | --- | --- |
| 1. Acer negundo L.[ Aceraceae] | 2, 3, 5, 6, 10, 13, 14, 15, 17, 20, 21, 22 | Ash-Leaf Maple/ Ashleaf maple/ Boxelder/ Box elder | Tree | Significant inhibitory activity against sarcoma 180 in mice (Kupchan et al., 1967) | Acerotin, acerocin (Kupchan et al., 1971), rutin, catechin,, apigenin, gallic acid, ferulic acid, and 2.5 dihydroxybenzoic acid, caffeic acid, quercetin-3-β-glucoside and isorhamnetin (Salgado-Garciglia et al., 2021) |
| 1. Ailanthus altissima (Mill.) Swingle [Simaroubaceae] | 21 | Tree of heaven | Tree | Analgesic, antipyretic and antiulcer activities (Rashed et al., 2012), antituberculosis, antimalarial, antitumor and antiherpes activities (Hwang et al., 2002), antioxidant, anti-microbial (Poljuha et al., 2022) | Quassinoids (Kubota et al., 1996), indole alkaloids (Souleles & Kokkalou, 1989) lipids and fatty acids (Kucuk et al., 1994), phenolic derivatives (Abd El-Baky et al., 2000), 3-caffeoylquinicacid, 4-caffeoylquinicacid, 5-caffeoylquinicacid, Kaempferol-galloyl-hexoside, gallic acid (Poljuha et al., 2022) |
| 1. Alopecurus myosuroides Huds.[Poaceae] | 11 | Black-grass/ slender foxtail | Herb | ** | ** |
| 1. Amaranthus retroflexus L. [Amaranthaceae] | 3, 5, 7, 10, 11, 15, 17, 21 | Red amaranth/ tumbleweed/ pigweed amaranth | Herb | Antioxidant activity (Mihaela et al., 2025), antimicrobial efficacy, anticancer, haemostatic, and wound-healing and antiinflammatory effects (Bs, 2024) | Polyphenols (Mihaela et al., 2025), flavonoids (e.g. rutin and quercetin) (Kalinova & Dadakova, 2009), alkaloids (e.g. amaranthine) (Fiorito et al., 2017), sesquiterpenes (Fiorentino et al., 2006), phenolic acids (Sokołowska-Woźniak, 1996) |
| 1. Ambrosia artemisiifolia L.[Asteraceae] | 11 | Ragweed | Herb | Antihelminthic, cardiotonic, antiinflammatory, analgesic, sedative, antimalarial (Rybalko, 1978), antimicrobial, and antiproliferative effects (Kovács et al., 2024) | Coronopilin, dihydropartenolide, psilostachyin, cumanin, peruvin, artemisiifolin, isabelin, psilostachyins C and B (Rybalko, 1978), 8 acetoxy-3-oxopseudoguaian-6,12-olide, ambrosin, cumanin diacetate, 4-oxo-3,4-secoamrosan-6,12-olidic acid and its methyl ester, 4-oxo-6 hydroxypseudoguai-11(13)-en-6,12 olide, 8-angeloyloxy-10-acetoxyguai-3-en-6,12-olide (Milosavljević et al., 1999), 3-hydroxy-11 H,13-dihydrodamsin, 3-acetoxy-11 H,13 dihydrodamsin (Błoszyk et al., 1992), paulitin, and isopaulitin (David et al., 1999) |
| 1. Amelanchier lamarckii F.G. Schroed [Rosaceae Juss.] | 2 | Romanian juneberries | Shrub | Antioxidant activity, enzymatic inhibitory potential against  tyrosinase, α-glucosidase, and acetylcholinesterase (Dăescu et al., 2024) | Anthocyanins (cyanidin), flavonols (quercetin), proanthocyanidins, and phenolic acids (Fang, 2021), cyanidin-galactoside, 3,4-dihydroxy-5-methoxybenzoic acid, feruloylquinic acid, and kaempferol (Dăescu et al., 2024) |
| 1. Amelanchier spicata (Lam.) K.Koch [Rosaceae] | 5, 7, 14, 21 | Dwarf serviceberry | Shrub | Antioxidant activity (Saunoriūtė et al., 2025) | Chlorogenic acid, neochlorogenic acid, quercitrin, rutin, and hyperoside (Saunoriūtė et al., 2025), isofucosterol and taraxerol (Saunoriūtė et al., 2026) |
| 1. Anthoxanthum aristatum Boiss. [Poaceae] | 7, 15, 21 | Annual Vernal Grass | Herb | ** | ** |
| 1. Aronia x prunifolia (Marshall) Rehder [Rosaceae] | 15, 23 | Purple chokeberry | Shrub | Antioxidant effects (Szopa et al., 2017) | Cyanidin glycosides, chlorogenic acid, neochlorogenic acid, quercetin, quercitrin, rutin,, and rosmarinic acid (Szopa et al., 2017), hydroxycinnamic acids, and Proanthocyanidins (Taheri et al., 2013) |
| 1. Aster novi-belgii L. [Asteraceae] | 5, 7, 11, 15, 17, 21 | New York Aster | Herb | Molluscicidal activity against Biomphalaria alexandrina snails (Hassan et al., 2011) | Triterpenoid saponins, oleanolic acid 3-O-β-D-galactopyranosyl (1→3)-α-L-arabinopyranoside; 3-O-β-D- glucopyranosyl- 3β, 16 αdihydroxyolean- 12- en- 28-oic acid-28-O-α-L- arabinopyranoside; {3-O-β-D- glucouronopyranosyl- 3β,16 αdihydroxyolean- 12-en -23-oic acid 28-O-β-D- xylopyranosyl- (1→3)-β-D- xylopyranosyl- (1→4)- α-Lrhamnopyranosyl-(l→2)-α-L-arabinopyranoside} ester and {3-O-β-D-glucouronopyranosyl-3β,16 αdihydroxyolean- 12-en- 23-oic acid 28-O-β-D- xylopyranosyl- (1→3)- β-D-xylopyranosyl (1→4)- [α-Larabinopyranosyl- (1→3)] -α-L- rhamnopyranosyl- (l→2)- α-L-arabinopyranoside} ester, and kaempferol, quercetin, kaempferol 3-O-β-D-glucopyranoside and quercetin 3-O-β-D-glucopyranoside (Hassan et al., 2011) |
| 1. Aster × salignus Willd.[Asteraceae] | 3, 11 | Grass aster/ purple loosestrife | Herb | ** | Terpenoids (spatuenol, aromadendrenoxyde, aromadendren , germakren D-1,10-epoxyde) (Trzhetsinsky et al., 2015) |
| 1. Avena fatua L. s.l. [Poaceae] | 5, 7, 10, 11, 14, 15, 21 | Wild oat/ spring wild oats | Herb | Antibacterial and anti-fungal activities (Aziz et al., 2023), antioxidant activity (Saeed et al., 2018) | Alkaloid, saponin and phenolic contents (Aziz et al., 2023) |
| 1. Bidens frondosa L. [Asteraceae] | 2, 3, 5, 6, 7, 10, 17, 20, 21, 23 | Common beggar-ticks | Herb | Antibacterial (Rahman et al., 2011), antioxidant (Venkateswarlu et al., 2004), antimalarial (Brandão et al., 1997) and antidiarrheal (Zhao & Wang, 1999), antiinflammatory activities (J. Le et al., 2015), anticancer, antiviral (Shawon et al., 2025), antidiabetic (Shawon et al., 2025), tyrosinase inhibitory activities (Abbas et al., 2017) | Acetylene (Brandão et al., 1997), polyenic D-glucosides (Pagani & Romussi, 1971), chalcones and aurones (Venkateswarlu et al., 2004), flavones and terpenes (J. M. Le et al., 2014) |
| 1. Bromus carinatus Hook. & Arn. [Poaceae] | 3, 5, 7, 11, 15, 21 | California brome | Herb | ** | ** |
| 1. Bunias orientalis L. [Brassicaceae] | 3, 4, 6, 10, 11, 18, 21 | Turkish cabbage | Herb | Antioxidant and antibacterial potential (Vergun, 2018) | Phenolic compounds (Vergun, 2018) |
| 1. Clematis vitalba L. [Ranunculaceae] | 5, 11, 15, 21 | Traveller’s Joy | Shrub | Antimycotic activity against Prototheca zopfii (Shahan & Pore, 1991), antibacterial (Khan et al., 2001), antiinflammatory, antinociceptive and antipyretic effects (Yesilada & Küpeli, 2007) | Vitalboside, n-triacontan, n-nonacosan, ginnon, ginnol, β-sitosterol, chlorogenic acid, caffeic acid, colneleic acid, colnelenic acid (Ulubelen, 1970) |
| 1. Conyza canadensis (L.) Cronquist [ Asteraceae] | 2, 3, 4, 5, 6, 7, 10, 11, 13, 15, 17, 20, 21, 23 | Horseweed/ Canadian fleabane | Herb | Antifungal activity (Phuong et al., 2015), cytotoxic, antibacterial, anti-inflammatory, antioxidant, and antiagregant (Csupor-Löffler et al., 2011; Lenfeld et al., 1986; Olas et al., 2006; Shakirullah et al., 2011), antiviral effects (Edziri et al., 2011), antidiarrhoeal and antihaemorrhoidal activities (Chevallier, 1996; Chiej, 1984; Sastri, 1952) | Monoterpenes, sesquiterpenes and acetylene derivative constituents (Liu et al., 2010; Ogg et al., 1975; Veres et al., 2012), flavonoids, benzoic acid derivatives, alkaloids, essential oils, sphingolipids, fatty acids and sterols (Ding et al., 2010; Xie et al., 2007) |
| 1. Cornus sericea L.emend. Murray [Cornaceae] | 3, 6, 7, 10, 15, 21 | Red Osier Dogwood/ Dogwood | Shrub | Antidiarrheal activity (Turner, 1990) | ** |
| 1. Digitalis purpurea L. [Plantaginaceae] | 5, 14, 15, 18, 23 | Foxglove/ purple foxglove | Herb | Cardiovascular, hepatoprotective, insecticidal and antioxidant, antidiabetic, antiproliferative effects (Zahid & Rizwani, 2016), antiinflammatory, anticancer, neuroprotective, and antimicrobial properties (Karakoti et al., 2025). | Digitoxin, digoxin, gitoxin and gitaloxin (Zahid & Rizwani, 2016), Luteolin, digicitrin and hesperidin, Apigenin, Dinatin (=Hispidulin), and Nepetin (Kartnig et al., 1977), digitolutein, 4-hydroxydigitolutein, and digitopurpone (1,4,8-trihydroxy-2-methylanthraquinone), 1,6-dihydroxy-3-methylanthraquinone (phomarin) and and isochrysophanol (1,8-dihydroxy-2-methylanthraquinone) (Brew & Thomson, 1971), jaitoxin, and jatitalin (Jan et al., 2024), gitonin, and tigonin (Singh & Panda, 2005) |
| 1. Diplotaxis muralis (L.) DC. [Brassicaceae] | 11, 21 | Annual wall rocket/ mustard rocket | Herb | Antioxidant activity (Ressurreição et al., 2025) | Mono-, di-, and/or triglycosides of kaempferol, quercetin, and isorhamnetin (3-O; 7-O; and/or 3-O,7-O-glycosides) (Bennett et al., 2006; Cartea et al., 2010), quercetin-3-O-β-D-galactopyranosyl-7-O-α-L-rhamnopyranosyl-(2→1)-O-β-D-xylopyranoside and isorhamnetin-3-O-β-D-galactopyranosyl-7-O-α-L-rhamnopyranosyl-(2→1)-β-D-xylopyranoside (Alaniya et al., 2012) |
| 1. Echinochloa crus-galli (L.) P.Beauv [Poaceae] | 3,5,7,10,11, 14,15,17,21 | Barnyard grass | Herb | Antidiabetic (Yumnam et al., 2012), antioxidant (Mehta & Vadia, 2014), cytotoxic activities against breast carcinoma, colon carcinoma, cervical carcinoma and liver carcinoma (El Molla et al., 2016). | 5,7-dihydroxy-31,41,51-trimethoxy flavone, 5,7,41 -trihydroxy31,51-dimethoxy flavone (tricin), quercetin, flavone, apigenin-8-C-sophoroside, 2-methoxy-4-hydroxycinnamic acid, p-coumaric acid and quercetin-3-O-glucoside (El Molla et al., 2016). |
| 1. Echinocystis lobata (F.Michx) Torr. & A. Gray [Cucurbitaceae] | 1,2,5,7,9,10,11,14,15,17,19,22,23 | Wild cucumber or balsam apple | Herb | Antioxidant (Ielciu et al., 2018; Vinogradova et al., 2021) and antitumor effects (Vinogradova et al., 2021) | Isoquercitrin, rutin, quercitrin, kaempferol, p-coumaric and ferulic acid (I. Ielciu et al., 2018), cucurbitacins (Sokolov, 1986), hispidulin, apigenin, sinapic acid (I.-I. Ielciu et al., 2017) |
| 1. Elodea canadensis Michx.[Hydrocharitaceae] | 1,2,5,7,10,14,15,17,20,21,23 | Canadian pondweed | Herb | ** | ** |
| 1. Epilobium ciliatum Raf. [Onagraceae] | 1,5,6,7,17,18 | American willowherb/ fringed willowherb | Herb | Antioxidant property (Granica et al., 2014) | Macrocyclic ellagitannins oenothein A and oenothein B (Vlase et al., 2024), flavonoids quercetin (Granica et al., 2014), isoquercetin, myricetin (Ivanauskas et al., 2023), isomyricetin, kaempferol and their glycosides (Comalada et al., 2005), sterols β-sitosterol (Jariene et al., 2020) |
| 1. Erigeron annuus (L.) Pers [Compositae] | 2,3,4,5,6,7,11,14,17,21 | Annual fleabane, daisy fleabane or eastern  daisy fleabane | Herb | Antifungal, antiproliferative (Nazaruk et al., 2010), antiatherosclerosis (Kim et al., 2005), antiinflammatory (Jo et al., 2013), antidiabetic (Jang et al., 2010), antiobesity (Zheng et al., 2021), cytoprotective, antioxidant (Kim & Kim, 2003), and neuroprotective effects (Yoon MiSo et al., 2014) | β-sitosterol, coumarins, flavonoids (Mohamed & Abd, 2006), terpenoids- monoterpenes, sesquiterpenes, diterpenoid; polyacetylenic compounds; γ-pyrone derivatives, sterols (Iijima et al., 2003) |
| 1. Fraxinus pennsylvanica Marshall [Oleaceae] | 5,7,14,17,19 | Green Ash/ Red Ash/ Swamp Ash | Tree | Antibacterial activity (Omar et al., 2000) | Quercetin, pinoresinol-derived hexosides, lariciresinol and apigenin (Eyles et al., 2007) |
| 1. Galinsoga ciliata (Raf.) S.F. Blake [Astraceaea] | 3,4,5,6,7,11,12,14,15,17,21,23 | Shaggy soldier | Herb | ** | ** |
| 1. Galinsoga parviflora Cav. [Astraceaea] | 3,5,7,10,11,15,16,17,21,23 | Gallant soldier/ quickweed/ waterweed/ potato  weed/ yellow weed | Herb | Alphaglucosiadase inhibitor & hypoglycemic, antioxidant, antiinflammatory, anti-cancer (Ali et al., 2017), antifungal, hepatoprotective (Mostafa et al., 2013), antibacterial (Surywanshi & Yadava, 2015), nematicidal (Ferheen et al., 2011), antiscavenging, anti-hyaluronidase (Bazylko et al., 2012), antiarthritic (Pandey, 2010), antiplatelet (Kiritikar, 2009), and analgesic effects (Tolossa et al., 2013) | Flavonoids, patulitrin, quercimeritrin, quercitagetrin and caffeoyl derivatives (Bazylko et al., 2012), Sinapic acid, Syringic acid, Vanillic acid (Al-Robai et al., 2023) |
| 1. Helianthus tuberosus L. [ Asteraceae] | 3,5,7,9,10,11,13,14,17,19,21,23 | Jerusalem artichoke or topinambour | Herb | Aperient, cholagogue, diuretic, stomachic and tonic effects, antibacterial, anti-inflammatory, antifungal and anticancer activities (Pan et al., 2009), antioxidant properties (Yuan et al., 2012) and antiviral effects (Cornescu et al., 2023) | 3-O-caffeoylquinic acid, caffeic acid, 3,5-dicaffeoylquinic acid (3,5-DiCQA), 1,5-dicaffeoylquinic acid (1,5-DiCQA), 4,5-dicaffeoylquinic acid (4,5-DiCQA) and 3,5-dicaffeoylquinic acid methyl ether (3,5-DiCQAME) (Yuan et al., 2012), desacetyleupaserrin, hymenoxin, nevadensin, kaempferol gluconate, kaempferol-3-o- glucoside, kaempferol, rutin, andrographin, nobiletin, silymarin, puerarin, rhamnazin, Δ7-stigmastenol, Δ7-campestenol (Y. Wang et al., 2020) |
| 1. Heracleum mantegazzianum Sommier & Levier [Apiaceae] | 3,4,7,16,22 | Giant hogweed | Herb | Antibacterial, antifungal (Walasek et al., 2015), and antiviral effects (Tkachenko, 2007) | Xanthotoxin (Walasek et al., 2015), coumarins (Jakubska-Busse et al., 2013) |
| 1. Heracleum sosnowskyi Manden. [Apiaceae] | 3,8,9,12,14,16,18,22 | Sosnowsky’s hogweed | Herb | Antibacterial (Borska et al., 2025), antioxidant, cytotoxic, antitumor (Hosseinzadeh et al., 2019), antifungal, and bone health-promoting properties (Pynam & Dharmesh, 2018), antiviral effects (Tkachenko, 2007) | Alkaloids, triterpene saponins, flavonoids and  furanocoumarins (Osipova & Gladkov, 2024) |
| 1. Hordeum murinum L. [Poaceae] | 5,11,21 | Wall barey | Herb | ** | ** |
| 1. Impatiens capensis Meerb.[Balsaminaceae] | 23 | Jewelweed | Herb | Antimicrobial effects (Yang et al., 2001) | Impatienol, kaempferol, quercetin and lawsone (Oku & Ishiguro, 2002)  and phenolics, lavonols, anthocyanins, quinones, (Yang et al., 2001), and saponins (Motz et al., 2015) |
| 1. Impatiens glandulifera Royle .[Balsaminaceae] | 1,3,4,5,6,7,8,9,10,11,12,15,16,17,18,19,22 | Indian balsam, Gnome's hatstand, | Herb | Neuroprotective, antidepressant-like and anxiolytic, antinociceptive, anti-inflammatory, antioxidant effects and moderate cytotoxicity against human leukaemia cells HL-60 and HL-60/MX2 (Žafran et al., 2025) | α-spinasterol, chondrillasterol, and ∆7-sitosterol (Žafran et al., 2025), naphthoquinones (Cimmino et al., 2016), phenolic acids (Szewczyk & Olech, 2017),  flavonoids (Szewczyk et al., 2019), phytosterols, triterpenoids and fatty acids (Szewczyk et al., 2018) |
| 1. Impatiens parviflora DC. [Balsaminaceae] | 1,2,3,5,6,7,9,10,11,12,13,14,15,17,19,20,21,22,23 | Small balsam | Herb | Antioxidant, antiinflammatory, antimicrobial, alleopathic, insecticidal (Grabowska et al., 2016), and antimelanoma effects (Grabowska et al., 2017) | 3-O-{[b-D-glucopyranosyl-(1!3)-]-[b-D-glucopyranosyl-(1!2)]}- b-D-glucuronopyranoside 16-O-acetyl-3b,22a,28-trihydroxy-olean-12-ene and 3-O-{[b-D-glucopyranosyl-(1!3)-]-[b-D-glucopyranosyl-(1!2)]}-bD-glucuronopyranoside 3b,16a,22a,28-tetrahydroxy-olean-12-ene (Grabowska et al., 2020), naphthoquinones (Pavela et al., 2009), mono- and digalactosyldiacylglycerols (Grabowska et al., 2016), caffeoylmalate,1,2,4-trihydroxynapthalene-1-O-glucoside, feruloylmalate, quercetin -3-O-hexoside, kaempferol-3-Oglucoside (4) (Hromádková et al., 2014) |
| 1. Juglans regia L. [juglandaceae] | 3,5,11,17,23 | Persian  walnut, white walnut, English walnut | Tree | Antibacterial, antifungal, antioxidant (Pereira et al., 2008), antihelmintic, astringent, keratolytic, antidiarrhoeal, hypoglycaemic (Mouhajir et al., 2001), antiatherogenic, osteoblastic (Papoutsi et al., 2008) and antiviral effects (Mei-zhi et al., 2006) | Pyrogallol, p-hydroxybenzoic acid, vanillic acid, ethyl gallate, protocatechuic acid, gallic acid, 3,4,8,9,10-pentahydroxydibenzo pyran-6-one, tannins, glansrins (Fukuda et al., 2003; Zhang et al., 2009) |
| 1. Juncus tenuis Willd. [Juncaceae] | 2,4,5,6,7,10,11,15,17,18,21,23 | Path rush, poverty  rush | Herb | Antiproliferative effects (Bús et al., 2020) | Juncusol, effusol, and 2,7-dihydroxy-1,8-dimethyl-5-vinyl-9,10 dihydrophenanthrene (Bús et al., 2020), luteolin, 5,7-dihydroxy-4-chromone, p-hydroxybenzoic acid, vanillic acid, and trans-p-coumaric acid (Barta et al., 2025) |
| 1. Lemna turionifera Landolt [Lemnaceae] | 10 | Red duckweed | Herb | ** | ** |
| 1. Lolium multiflorum Lam. [Poaceae] | 6,10,11,15,17 | Italian ryegrass | Herb | Antioxidant, antiseptic, antiinflammatory (Choi et al., 2017), antitumor and antibacterial effects(K. D. Lee et al., 2018) | a-linolenic acid, docosahexaenoic acid, oleic acid, docosatetraenoic acid and caprylic acid (Valan Arasu et al., 2014) |
| 1. Lupinus polyphyllus Lindl. [ Fabaceae] | 3,4,5,6,7,8,11,14,15,17,19,21 | Garden lupin | Herb | Antiradical activity (Purmalis et al., 2025) | Gallic acid, catechin, epigallocatechin, ellagic acid, epicatechin, catechin gallate, and epicatechin gallate (Boinik et al., 2015) |
| 1. Lycium barbarum L. [Solanaceae] | 3,5,7,11,15,21 | Chinese wolfberry/ goji berry/ wolfberry/ barbary  matrimony vine/ red medlar/ and matrimony vine | Shrub | Hepatoprotective (Sevindik et al., 2025), anticancer, antitumor, cytotoxic (Georgiev et al., 2019), anti-diabetic, hypoglycemic (Ma et al., 2022), antiinflammatory (S. R. Lee et al., 2020), antimicrobial (Ilić et al., 2020), antioxidant (Shang et al., 2022), antiviral (Li et al., 2023), antiradiation, antifatigue, antiaging, antistress, antiyeast, cardio protective and wound healing effects (Kwok et al., 2019; Leontopoulos, Skenderidis, Kalorizou, et al., 2017; Leontopoulos, Skenderidis, Anatolioti, et al., 2017) | Caffeic acid, chlorogenic acid, p-coumaric acid, ferulic acid, isoquercitrin, gensitic acid, kaempferol, rutin (Dong et al., 2011; Mocan et al., 2014), salicylic acid, sinapic acid (Mocan et al., 2015; Pollini et al., 2020), syringic acid, quercitrin, quercetin, vanilic acid, vanilin (Dong et al., 2011; Mocan et al., 2014, 2015; Pollini et al., 2020), acetic acid, hexadecanoic acid, ethyl lactate, 3-hydroxy-2- butanone, linoleic acid, 1-methoxy-2-propanone, 𝛽 -elemene, myristic acid, ethyl hexadecanoate (Altintas et al., 2006), hexanal, (E)-2-hexenal, nonanal (F. Chen et al., 2015), isoamylol, 1-hexanol, 1-octen-3-ol (Lu et al., 2017), hexyl acetate, methyl salicylate, ethyl octanoate, o-cymene, d-limonene, linalool, 𝛽 -cyclocitral, 2-pentylfuran (Altintas et al., 2006; F. Chen et al., 2015; Lu et al., 2017) |
| 1. Lysimachia punctata L. [Myrsinaceae] | 18 | Spotted loosestrife | Herb | Antioxidant (Toth et al., 2014) and cytotoxic effects (Podolak et al., 2005) | Myricitrin, quercetin-hexoside (Toth et al., 2014), hydroxycinnamic acid (Toth et al., 2012), embelin (Podolak et al., 2005) |
| 1. Mimulus guttatus DC. [Phyrmaceae] | 5,8,15 | Yellow monkeyflower | Herb | ** | Caffeic acid esters (Mølgaard & Ravn, 1988), mimulosides, verbascoside, conandrosides, calceolariosides A and B (Keefover-Ring et al., 2014) |
| 1. Onobrychis viciifolia .Scop.[Fabaceae] | 11 | Sainfoin/ St. Foin | Herb | Antimalarial (Bowers et al., 1995) and antioxidant effects (Ince et al., 2012) | Polyphenols, condensed tannins, arbutin, kaempferol, quercetin, rutin, afzelin, the branched quercetin-3-(2 G -rhamnosylrutinoside), the amino acid l-tryptophan, the inositol (+)-pinitol (Marais et al., 2000; Regos et al., 2009) |
| 1. Oxalis corniculata L. [Oxalidaceae] | 2 | Creeping wood sorrel | Herb | Anthelmintic, antiinflammatory, analgesic, astringent, depurative,  diuretic, emmenagogue, febrifuge, relaxant, lithontripic, stomachic and styptic, cardio relaxant, antibacterial, antiamoebic, antiimplantation and abortifacient (Badwaik et al., 2011), wound-healing (Taranalli et al., 2004); anticancer (Kathiriya et al., 2010); antifungal (Verma et al., 2008), antioxidant (Reddy et al., 2010), antiepileptic (Sharma & Kumari, 2014); antiulcer activity (Patil et al., 2011), and antidiabetic effects (Dutta et al., 2016) | Flavonoids, iso vitexine and vitexine-2”- O- beta – D- glucopyrunoside, palmitic acid,oleic, linoleic, linolenic and stearic acids (Badwaik et al., 2011); oleanolic acid, eburicoic acid, squalene, and phytol (Karimzadeh et al., 2019); trigonelline (Feng et al., 2023); quercetin, kaempferol, and gallic acid (Nashipudi et al., 2025) |
| 1. Oxalis fontana Bunge [Oxalidaceae] | 4,6,7,10,11,14,17,21 | Common yellow woodsorrel | Herb | ** | ** |
| 1. Padus serotina (Ehrh.) Borkh. [(Rosaceae] | 3,7,10,13,14,17,19,22,23 | American black cherry | Tree | Antioxidant (Luna-Vázquez et al., 2013), cardiovascular (Luna-Vázquez et al., 2016), vasodilating (Luna-Vázquez et al., 2013), and antibacterial properties (Telichowska, Kobus-Cisowska, Ligaj, et al., 2020) | 5-caffeolquinic acid 2 (Mikulic-Petkovsek et al., 2016), gallic acid (Donno et al., 2018), prunazine and amygdalin (Telichowska, Kobus-Cisowska, & Szulc, 2020), vanillic acid, rutin, kaempferol hexoside pentoside, quercetin hexosyl pentoside 3, quercitrin, Uvaol, and ursolic acid (Luna-Vázquez et al., 2013) |
| 1. Parthenocissus inserta (A. Kern.) Fritsch [Vitaceae] | 2,3,7,11,14,17 | Thicket creeper | Creeper | ** | ** |
| 1. Quercus rubra L.[Fagaceae] | 2,3,5,7,9,10,11,13,14,15,17,19,21,22,23 | Northern red oak | Tree | Antioxidant, antibacterial, antifungal potential, α-glucosidase, and tyrosinase inhibitory (Tanase et al., 2022) | Tannins (Tanase et al., 2022), gallic and ellagic acids, flavan-3-ols and flavonols (Cantos et al., 2003; Oracz et al., 2022; Rakić et al., 2007; Vinha et al., 2016), rutin, quercetin-3-β-glucoside, luteolin, neohesperidin; catechins: catechin, epicatechin, epicatechin gallate, gallocatechin; hydroxycinnamic acids: chlorogenic, caffeic, trans-ferulic, trans-cinnamic, p-coumaric, hydroxyphenylacetic, benzoic, syringic, sinapic acids (Konovalova et al., 2023) |
| 1. Reynoutria xbohemica Chrtek et Chrtková [Polygonaceae] | 7,11 | Bohemian knotweed | Herb | Antioxidant, antidiabetic, and antimicrobial against yeast (Pogačnik et al., 2020) | Stilbenes (e.g., resveratrol and polydatin) (Chen et al., 2013) and emodin (Kovárová et al., 2010), as well as different catechins (Vrchotova et al., 2010) and carotenoids (Metličar et al., 2019) |
| 1. Reynoutria japonica (Houtt.) Ronse Decraene [Polygonaceae] | 2,3,5,6,7,9,11,12,13,14,15,16,17,21,22,23 | Japanese knotweed | Herb | Antimicrobial against yeast (Pogačnik et al., 2020), antiallergic, antimutagenic, antioxidant, antibacterial, antiviral (Bralley et al., 2008; Goc et al., 2015; Zahedi et al., 2013), and antiinflammatory effects (Jo et al., 2024) | Stilbenes (e.g., resveratrol and polydatin) (Chen et al., 2013) and emodin (Kovárová et al., 2010), as well as different catechins (Vrchotova et al., 2010) and carotenoids (Metličar et al., 2019) |
| 1. Reynoutria sachalinensis (F. Schmidt) Nakai [Polygonaceae] | 5,7,8,11,12,13,16 | Knotweed | Herb | Antibacterial, antioxidant (Abdulrazzaq Yasir Alrikabi, Viktoriia Protska, Nadiia Burda*Zhuravel & Kuznetsova, 2021), skin-whitening, antiinflammatory, anticancer (Lee et al., 2025), neuroprotective, and Acetylcholinesterase inhibitory effects (Eom et al., 2017) | Gallic acid, chlorogenic acid, trans-cinnamic acid, rutin, hyperoside and isoquercitrin (Abdulrazzaq Yasir Alrikabi, Viktoriia Protska, Nadiia Burda*Zhuravel & Kuznetsova, 2021), quercetin 3-O-glucoside and quercetin 3-O-(6″-acetyl-glucoside) (H. Lee et al., 2025), 1-decanol, b-amyrin, dammaran-3b-ol, campesterol, daucosterol, ergosterol peroxide, emodin 8-O-b-D-glucopyranoside, and isoquercitrin (Eom et al., 2017), vanicoside A and vanicoside B (Nawrot-Hadzik et al., 2020), emodin glucoside, emodin-8-O-(6’-O-malonyl)-d-glucoside, hydropiperoside, physcion-8-O-β-d-glucoside, questin, emodin (Suprun et al., 2024) |
| 1. Rhus typhina L.[Anacardiaceae] | 5,7,11,14,19,23 | Staghorn Sumac | Shrub | Antihaemorrhoidal, antiseptic, diuretic (Moerman, 1998), antiinflammatory, hemostatic, and antihaemorrhoidal (Kossah et al., 2010), antioxidant (Kossah et al., 2011), interferon-inducing and antitumor (Islambekov et al., 1994), antiprotease (Jedinak et al., 2010), antibacterial, fungicidal (Zazharskyi et al., 2020), antidiabetic activity (Fereidoonfar et al., 2019) and antiviral effects (Antov et al., 2023) | Gallic acid, gallotannin (Werner et al., 2004), sumaflavone, and trigallic acid (Nazir et al., 2025) |
| 1. Robinia pseudoacacia L.[Fabaceae] | 3,5,6,7,9,10,11,13,14,15,17,19,20,21,22,23 | Black locust | Tree | Antispasmodium, febrifuge, antioxidant; diuretic, emollient, antitumor, sedative, anti-inflammatory effects, hypotensive, laxative, anticoagulant, and α-glucosidase inhibitory (Lukash et al., 2024), antibacterial (Marinas et al., 2014), antifungal (Hosseinihashemi et al., 2015), and antimelanogenic effects (Chung et al., 1999) | Catechin, kaempferol glucuronyl rhamnosyl hexosides, luteolin dirhamnosyl hexosides and vescalagin (Lukash et al., 2024), acacetin, apigenin, diosmetin, luteolin, and quercetin (H. S. Kim et al., 2019), epigallocatechin, ferulic acid, hyperoside, and rutin (Savic Gajic et al., 2019), robinlin (Tian et al., 2001), dihydrobinetin and robinetin (Rudman, 1963), secundiflorol, mucronulatol, isomucronulatol, and isovestitol (Tian & McLaughlin, 2000) |
| 1. Rosa rugosa Thunb.[Rosaceae] | 3,4,5,6,10,11,15,18,19,21,22,23 | Rugosa rose, Japanese rose | Shrub | Inhibitory effects on acetylcholinesterase, antihypertensive (Xie & Zhang, 2012), astringent (Youwei & Yonghong, 2007), inhibitory activity against HIV reverse transcriptase (Fu et al., 2006), antioxidant, anticancer, antiinflammatory (Kim et al., 2022), and antidiabetic effects (Chen et al., 2015) | Quercitrin, tannin, fatty oil, organic acids (gallic acid), β-carotene, citronellol, geraniol, nerol, eugenol, phenethyl alcohol (Xie & Zhang, 2012), linalool, phenylethyl alcohol, citronellol, α-bisabolol, anthocyanins, procyanidins, proanthocyanidins (Ren et al., 2018), triterpenoid saponins (pulsatilloside F, hederacolchiside F, patrinia saponin H3, hederasaponin B, and cussosaponin C) (Thao et al., 2014) |
| 1. Rudbeckia laciniata L.[Asteraceae] | 2,3,4,5,7,9,11,14,15,17,21 | Cutleaf coneflower | Herb | ** | Prelacinan-7-ol, igalan, and lacinan-8-ol (Fukushi et al., 1998) |
| 1. Rumex confertus Willd.[Polygonaceae] | 2,3,4 | Asiatic dock | Herb | Wound healing, antibacterial (Umarov et al., 2024), antifungal (Shermatova, 2021), antioxidant (Saoudi et al., 2021), and anticancer effects (Gülüm et al., 2025) | Hydroxycinnamic acids, and anthraquinones (Sun & Shahrajabian, 2023), tannins (ellagic acid,phloroglucinum and caffeic acid), flavonoids (nepodin, chrysophanoicacid, emodin) (Eshbakova et al., 2022), flavone glycosides (hyperoside and rutin) (Eisenman et al., 2012) |
| 1. Setaria pumila (Poir.) Roem.et Schult. [Poaceae] | 2,5,7,10,15,17,21 | Yellow foxtail, Summer-grass, golden foxtail, wild millet | Herb | ** | ** |
| 1. Setaria viridis (L.) Beauv. [Poaceae] | 2,3,5,7,10,15,17, | Green foxtail | Herb | Antiinflammatory, antioxidant, hepatoprotective (Kwon et al., 2025), and antibacterial effects (Fan et al., 2014) | Tricin, p-hydroxycinnamic acid, vitexin 2''-O-xyloside, orientin 2''-O-xyloside, tricin-7-O-beta-D-glucoside and vitexin 2"-O-glucoside (Kwon et al., 2002), naphthol rhamnosides (8-O-α-L-rhamnosyl-β-sorigenin, 6-hydroxy-8-O-α-L-rhamnosyl-β-sorigenin, and 6-methoxy-8-O-α-L-rhamnosyl-β-sorigeni)n (Fan et al., 2014) |
| 1. Solidago canadensis L.[Asteraceae] | 5,6,7,8,10,11,12,13,14,15,17,20,21,22,23 | Canada goldenrod | Herb | Antioxidant, antiinflammatory, spasmolytic, diuretic (Wang JianFang et al., 2011), antibacterial (Deng et al., 2015), antimutagenic (Hayder et al., 2005) and analgesic effects (Mishra et al., 2011) | Triterpenoids (lupeol, lupeyl acetate, ursolic acid, cycloartenol, cycloartenyl palmitate, α-amyrin acetate, and stigmasterol, 3β-(3R-acetoxyhexadecanoyloxy)-lup-20(29)-ene, 3β-(3-ketohexadecanoyloxy)-lup-20(29)-ene, 3β-(3R-acetoxyhexadecanoyloxy)-29-nor-lupan-20-one, and 3β-(3-hetohexadecanoyloxy)-29-nor-lupan-20-one) (Chaturvedula et al., 2004) |
| 1. Solidago gigantea Aiton .[Asteraceae] | 2,3,4,5,6,7,8,9,10,11,12,13,14,15,17,21,22 | Giant goldenrod | Herb | Antioxidant, antiinflammatory, antifungal, antiviral, insecticidal (Čerevková et al., 2020; Kołodziej et al., 2011; Lenda et al., 2013), and antimutagenic effects (Chekir-ghedira, 2011) | Flavonoids (quercetin, kaempferol, and rutin); terpenoids (limonene, α-pinene, and β-caryophyllene; saponins); and phenolic acids (chlorogenic, caffeic, and rosmarinic acids) (Gębarowska et al., 2026) |
| 1. Solidago graminifolia (L.) Elliott .[Asteraceae] | 5,8 | Grass-leaved goldenrod | Herb | Antioxidant, antibacterial, and antifungal activities (Toiu et al., 2019) | Acetylenes (Lam et al., 1992), di-C-glycosylflavones (schaftoside, isoschaftoside) (Budzianowski, 1990), flavonoid glycosides (hyperoside, rutin, quercitrin), flavonoid aglycones (quercetin, luteolin, kaempferol), and phenolic acids (caftaric, gentisic, chlorogenic, p-coumaric, ferulic, gallic, protocatechuic, vanillic, syringic, rosmarinic acids) (Toiu et al., 2019) |
| 1. Spiraea tomentosa L.[Rosaceae] | 5 | Hardhack | Shrub | Antibacterial and antioxidant activities (Fulcher, 2008) | ** |
| 1. Telekia speciosa (Schreb.) Baumg.[Asteraceae] | 4,5,18 | Heartleaf oxeye | Herb | Cytotoxic (Réthy et al., 2007), antiproliferative activity against human cancer cell lines (Spiridonov et al., 2005), antiinflammatory, anticancer and antibacterial effects (Čilović-Kozarević et al., 2021) | Eudesmane-type sesquiterpene lactones (Stojakowska et al., 2011), xanthanolides, terpenoid cyclopropenone derivatives, polyacetylene, thymol and nerol derivatives (Bohlmann et al., 1981), geraniol, α-humulene, cameroonan-7α-ol, fukinone (Cilović et al., 2019), 6-O-(E)-caffeoyl-glucopyranose, and 3-O-caffeoylquinic acid (chlorogenic acid), violaxanthin, lutein 5,6-epoxide and antheraxanthin,, β-carotene 5,6-epoxide and β-carotene 5,6,5′,6′-diepoxide (Varga et al., 2023) |
| 1. Veronica filiformis Sm.[Plantaginaceae] | 4,6,11 | Slender speedwell | Herb | ** | Anthocyanidin delphinidin, isoscutellarein 4′-methyl ether 7-O-β-(6‴-O-acetyl-2″-O-allosylglucoside) (Salehi et al., 2019) |
| 1. Veronica persica Poir.[Plantaginaceae] | 3, 4, 5, 6, 7, 10, 11, 14, 15, 17, 18, 21 | Common field speedwell/ Persian speedwell | Herb | Antibacterial, scolicidal, and inhibitory potential on acetylcholinesterase, tyrosinase, lipoxygenase and xanthine oxidase (Sharifi-Rad, Tayeboon, et al., 2018),  antioxidant (Sharifi-Rad, Sharifi-Rad, et al., 2018), antifungal, mitodepressive, and antiinflammatory effects (Fierascu et al., 2018) | Calendin, tyrosol, and two benzoic acid derivatives (Sarker et al., 2000), persicoside, acteoside, isoacteoside, and lavandulifolioside (Salehi et al., 2019), hexitol, dulcitol, aucubin, veronicoside, amphicoside, 6-O-veratroyl-catalpol, catalposide, verproside, and verminoside (Harput et al., 2002) |
| 1. Vicia grandiflora Scop.[ Fabaceae] | 21 | Large yellow  vetch | Herb | ** | Behenic acid (Cacan et al., 2016) |
| 1. Xanthium albinum (Widder) H. Scholz [Asteraceae] | 7, 20, 21 | Riverside Cocklebur | Herb | ** | ** |

Key: Sh=Shrub; H=Herb; L=Leaves, F=Flowers, Fr=Fruits, Se=Seeds, Tw=Twig, R=Roots, St=Stem, Tr=Tree;

1=Białowieża NP, 2=Biebrza NP, 3=Kampinos NP, 4=Tuchola NP, 5=Wigry NP, 6=Drawa NP, 7=Narew NP, 8=Roztocze NP, 9=Ojców NP, 10=Wielkopolska NP, 11=Babia Góra NP, 12=Bieszczady NP, 13=Gorce NP, 14=Karkonosze NP, 15=Magura NP, 16=Pieniny NP, 17=Polesie NP, 18=Słowin NP, 19=Stołowe Góry NP, 20=Święty Krzyż NP, 21=Tatra NP, 22=Ujście Warty NP, and 23=Wolin NP

**= Not documented
